# Supplementary material for: The archaeal transamidosome for RNA-dependent glutamine biosynthesis
Source: PubMed Central journal article supplement — Nucleic Acids Res. 2010 May 10;38(17):5774–83. doi: 10.1093/nar/gkq336 (PMC2943598; doi:10.1093/nar/gkq336), 2010-05-10
Supplement: supp_gkq336_suplemental.pdf [file supp_gkq336_suplemental.pdf]

**Supplemental Table 1:** Deacylation of Glx-tRNA<sup>Gln</sup> in the presence or absence of ND-GluRS and/or GatDE.

**t<sub>1/2</sub> (minutes)**

|                     | Glu-tRNA <sup>Gln</sup> | Gln-tRNA <sup>Gln</sup> |
|---------------------|-------------------------|-------------------------|
| No enzyme           | 3.3 ± 0.2               | 3.1 ± 0.1               |
| ND-GluRS            | 1.7 ± <0.1              | 1.9 ± 0.1               |
| GatDE               | 4.6 ± 0.5               | 2.3 ± 0.1               |
| ND-GluRS +<br>GatDE | 3.5 ± 0.2               | 1.6 ± 0.1               |

Glx-tRNA<sup>Gln</sup> (200 nM) indicated incubated at 65 °C with or without ND-GluRS (2 μM) and/or GatDE (2 μM) and aliquots quenched in 100 mM sodium citrate, pH 4.5, with 0.2 mg/mL of nuclease P1 as described in Materials and Methods.

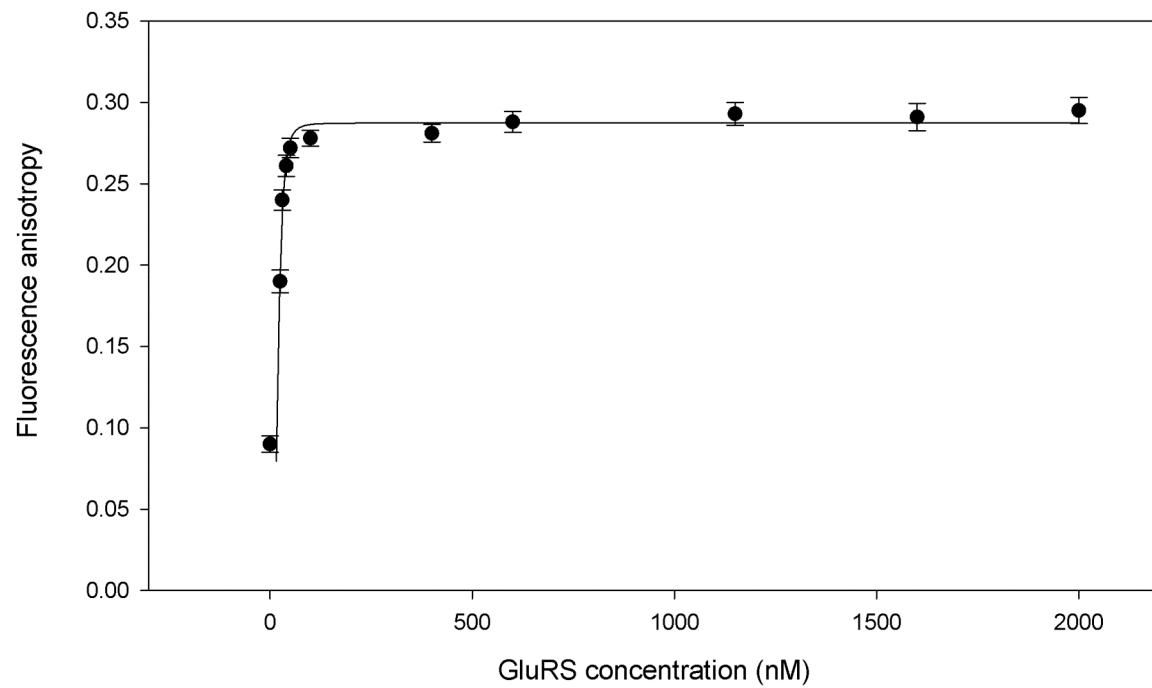

**Supplemental Figure 1** AF-labeled GatDE (20 nM) incubated with increasing concentrations of ND-GluRS (up to 2  $\mu$ M). Change in fluorescence anisotropy monitored as described in Materials and Methods.

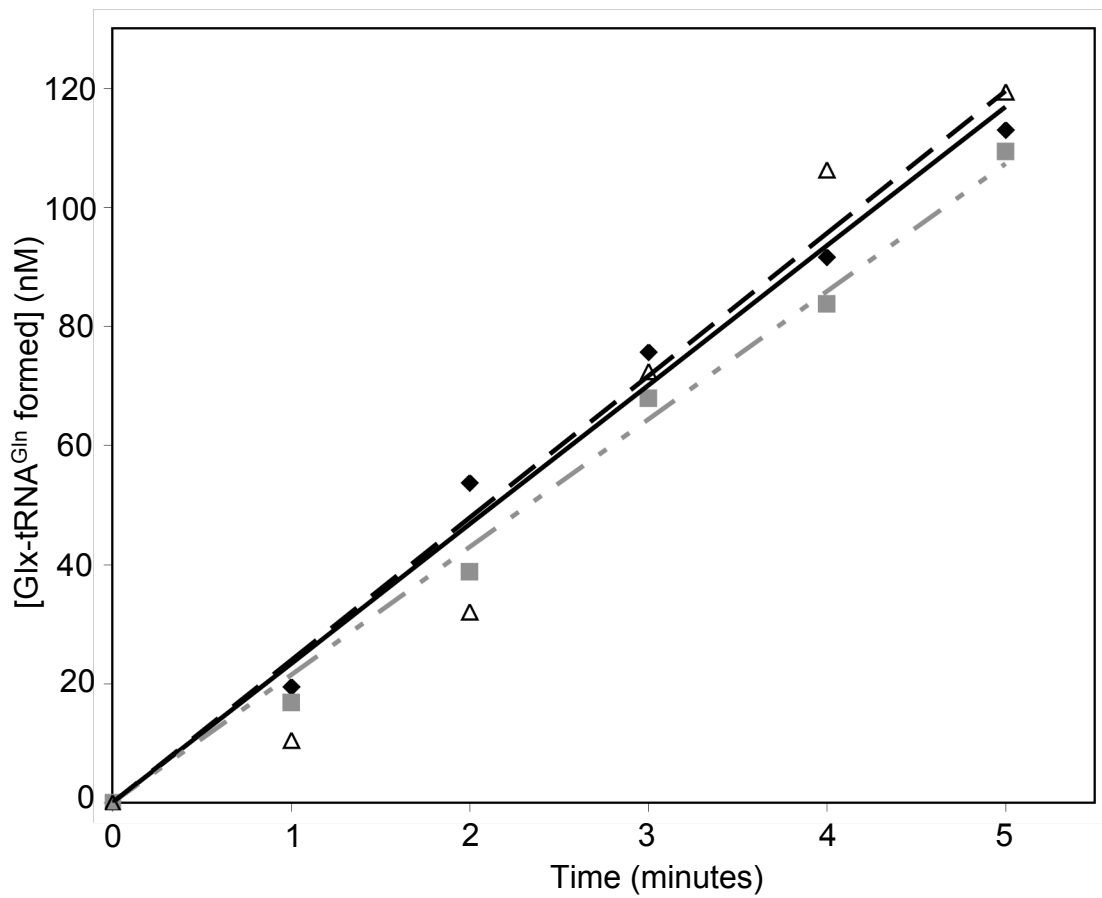

**Supplemental Figure 2** tRNA<sup>Gln</sup> (10  $\mu$ M) aminoacylated as described in the Material and Methods by ND-GluRS (100 nM) alone ( $\Delta$ , black dashed line) or with either GatDE (2  $\mu$ M)( $\blacklozenge$ , solid black line) or BSA (2  $\mu$ M)( $\blacksquare$ , grey dashed line).

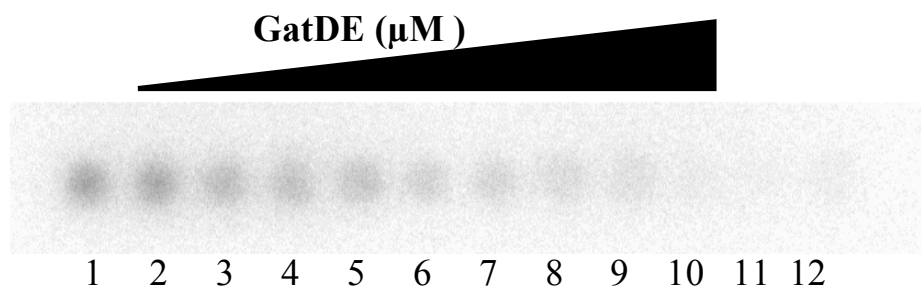

**Supplemental Figure 3** [ $^{32}\text{P}$ ] tRNA<sup>Glu</sup> (5 nM) incubated at room temperature for 25 min with ND-GluRS (60 nM) (1), ND-GluRS (60 nM) and increasing concentrations of GatDE (7.8 nM to 2  $\mu\text{M}$ ) (2-10), GatDE (2  $\mu\text{M}$ ) (11), or no enzyme (12) as described in the Materials and Methods. Samples were spotted on a nitrocellulose membrane and visualized as described in the Materials and Methods.

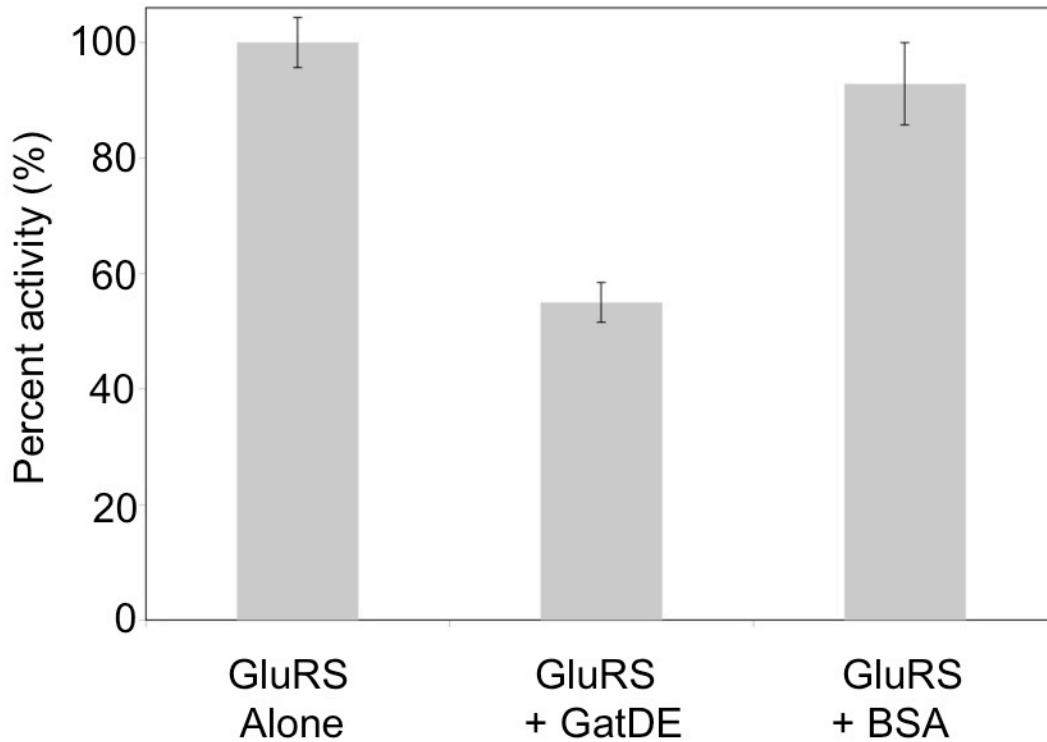

**Supplemental Figure 4** tRNA<sup>Glu</sup> (80 nM) glutamylated by ND-GluRS (50 nM) alone or in the presence of either GatDE (1.8  $\mu$ M) or BSA (1.8  $\mu$ M) as described in the Materials and Methods. Activity relative to the GluRS alone. Errors bars represent standard deviations.
